# Supplementary material for: Stabilizing all-inorganic CsPbI3 perovskite films with polyacrylonitrile for photovoltaic solar cells
Source: Royal Society of Chemistry journal article supplement (doi:10.1039/d1ya00068c), 2021-12-23
Supplement: d1ya00068c1.pdf [file d1ya00068c1.pdf]

## Supporting Information

Stabilizing all-inorganic CsPbI<sub>3</sub> perovskite with polyacrylonitrile for  
photovoltaic solar cells

Guanghui Yu, Ke-Jian Jiang, Wei-Min Gu, Yue Zhang, Yanting Xu, Tangyue Xue,  
Xinning Jiao, Yiqiang Zhang, Yanlin Song

## Experimental Details

**Materials.** Dimethylammonium iodine (DMAI) and bis(trifluoromethane) sulfonamide lithium salt (Li-TFSI) were purchased from TCI. Cesium iodide (CsI), Lead (II) iodide ( $\text{PbI}_2$ ), FK209 Co(III) bis(trifluoromethane) sulfonimide salt and Spiro-OMeTAD (2,2',7,7'-tetrakis[N,N-di(4-methoxyphenyl) amino]-9,9'-spirobifluorene) were purchased from Xi'an Polymer Light Technology Corp. Polyacrylonitrile (PAN) was purchased from Shanghai Macklin Biochemical Co., Ltd (Mw 50,000). Anhydrous N, N-dimethylformamide (DMF) was purchased from Innochem. 4-tert-butylpyridine (tBP) and acetonitrile were purchased from Sigma-Aldrich. Other materials were purchased from Sinopharm Chemical Reagent Co. Ltd. And all materials used without any further purification.

**Solar cell fabrication.** The FTO glasses were cleaned by deionized water, ethyl alcohol, acetone, and isopropanol with ultra-sonication for 20 min respectively, then dried by the flow  $\text{N}_2$ . Afterwards, a compact  $\text{TiO}_2$  film was prepared by immersing the FTO glasses in 200 mM  $\text{TiCl}_4$  aqueous solution at 70 °C for 1 hour, then washed with deionized water and ethanol before annealing at 100 °C for 1 hour.

The CsI,  $\text{PbI}_2$  and DMAI were mixed in anhydrous DMF at the molar ratio of 1:1:1 to form a 0.6 M precursor solution. 43.3 mg of PAN was dissolved in 1ml DMF, and a varied volume of the PAN solution was added into the precursor solution. The resultant precursor solution was spin-coated at 3000 r.p.m for 30 s on the  $\text{TiO}_2$ /FTO substrates treated by  $\text{O}_3$ /ultraviolet for 20 min, followed by annealing at 210°C for 5min. The hole transport layer was formed by spin-coating Spiro-OMeTAD solution at 3000 r.p.m for 30 s. Spiro-OMeTAD solution was prepared by dissolving 72.3 mg of Spiro-OMeTAD, 28.8  $\mu\text{L}$  of 4-tert-butyl pyridine, 17.5  $\mu\text{L}$  Li-TFSI solution (520 mg of Li-TFSI in 1 mL acetonitrile), 28  $\mu\text{L}$  of FK209 Co (III) (300 mg of FK209 Co (III) in 1 mL acetonitrile). Finally, a ~80 nm thick Au electrode layer was deposited using thermal evaporation under vacuum.

**Measurement and characterization.** The morphologies of the perovskite films were evaluated by the field-emission scanning electron microscopy (SEM, JEOL, JSM-

7500F, Japan). Absorption spectra were conducted by a UV/Vis spectrometer (SHIMADZU, UV-1800 UV/Vis Spectrophotometer) in the wavelength range of 300-900 nm. The XRD patterns were collected by using a X'Pert powder X-ray diffractometer (Bruker D8) with monochromatic Cu K $\alpha$  radiation ( $\lambda = 1.5418 \text{ \AA}$ ) operated at 40 kV and 40 mA. Current density-voltage characteristics of the PSCs were measured under 1 sun illumination in a glovebox filled with N<sub>2</sub>, using a programmable Keithley 2400 source meter under AM 1.5G solar irradiation at 100 mW cm<sup>-2</sup> (Enli Tech, Class AAA solar simulator). The EQE was measured by illumination with monochromatic (Enli Tech, Class AAA solar simulator, QE-mini).

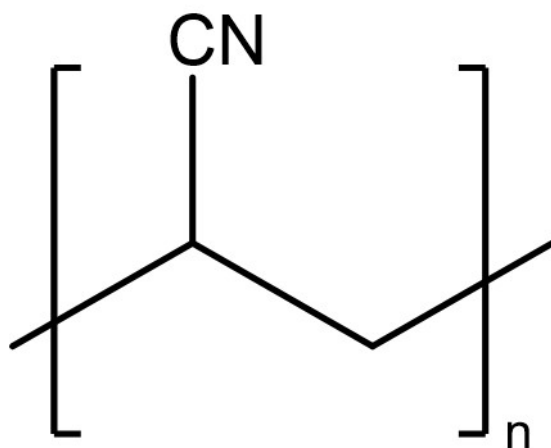

**Fig. S1.** The chemical structure of PAN.

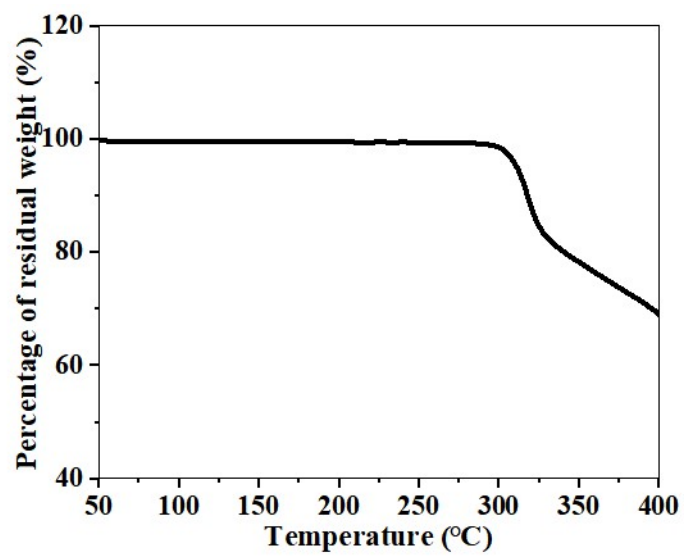

**Fig. S2.** Thermogravimetric analysis (TGA) of PAN.

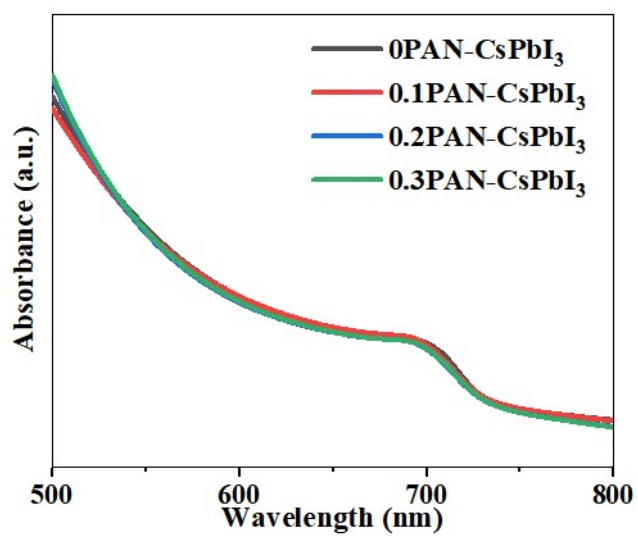

**Fig. S3.** UV-vis spectra of xPAN-CsPbI<sub>3</sub>.

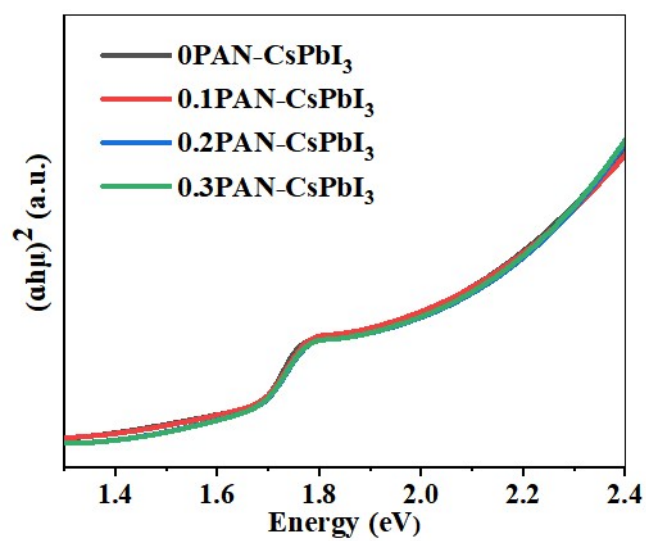

**Fig. S4.** Tauc Plots of xPAN-CsPbI<sub>3</sub> films.

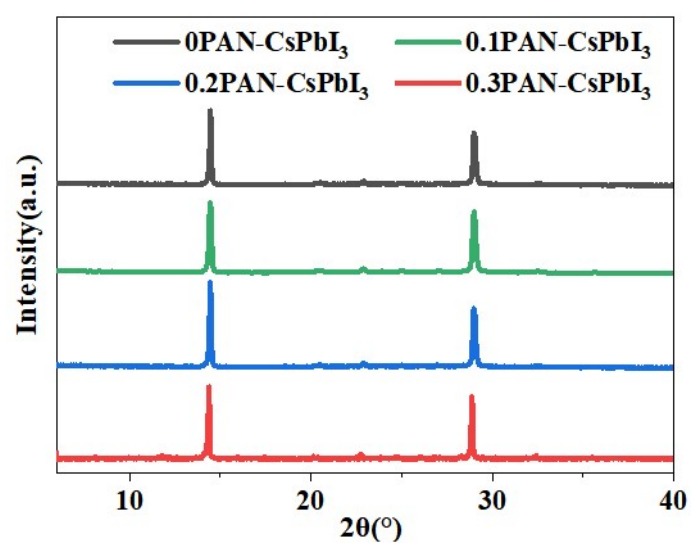

**Fig. S5.** XRD patterns of xPAN-CsPbI<sub>3</sub>.

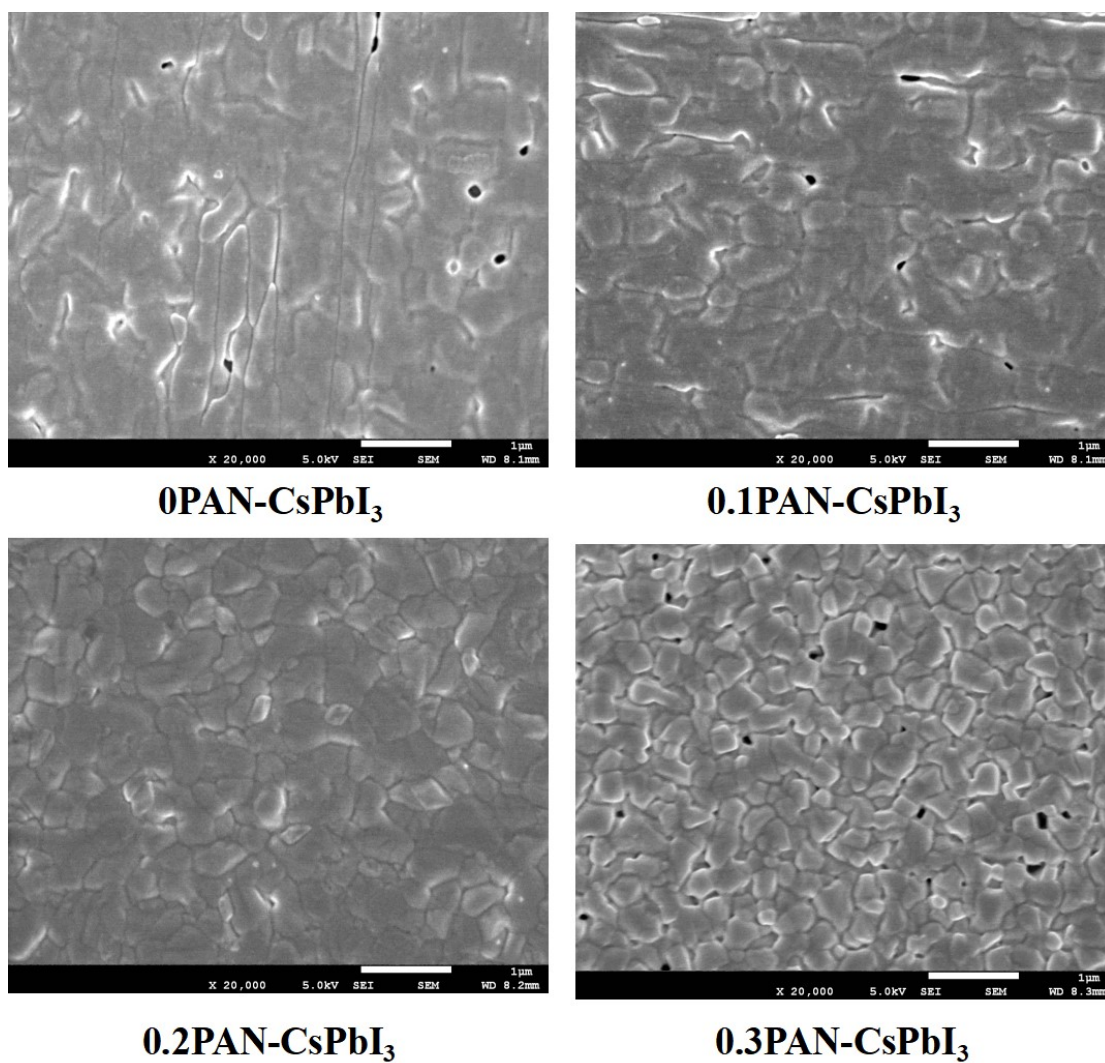

**Fig. S6.** Top-surface SEM images of  $x$ PAN-CsPbI<sub>3</sub> perovskite thin films. Scale bar, 1  $\mu$ m.

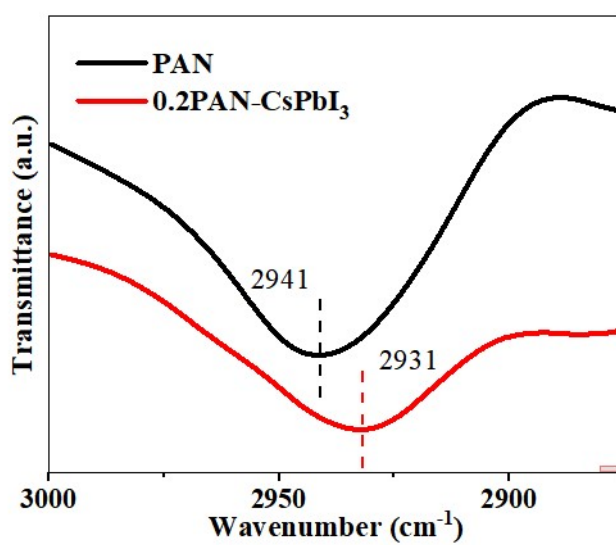

**Fig. S7.** The FTIR of the C-H of the PAN and the 0.2PAN-CsPbI<sub>3</sub>.

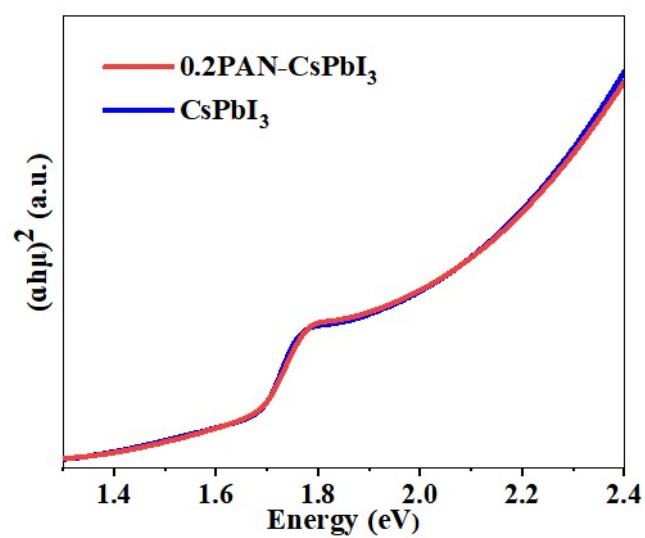

**Fig. S8.** The Tauc plots of the Control and the Target films.

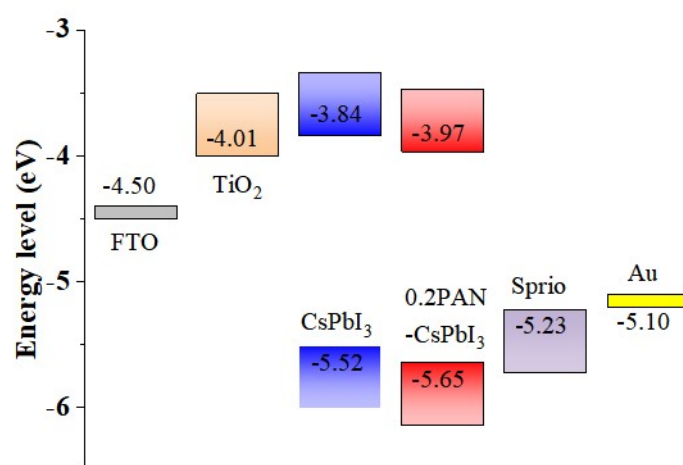

**Fig. S9.** The corresponding Energy diagram of each layer that constitute the solar cells.

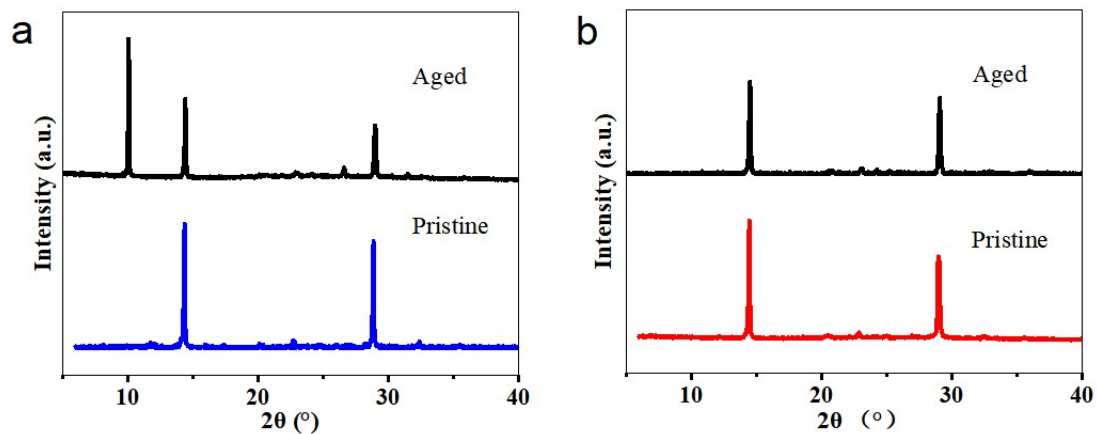

**Fig. S10.** The XRD spectra of the films after and before aging for 24 hours. (a) the  $\text{CsPbI}_3$  and (b) the  $0.2\text{PAN-CsPbI}_3$  ( at the ambient conditions with  $30\pm 5\%$  RH and at  $25^\circ\text{C}$ ).

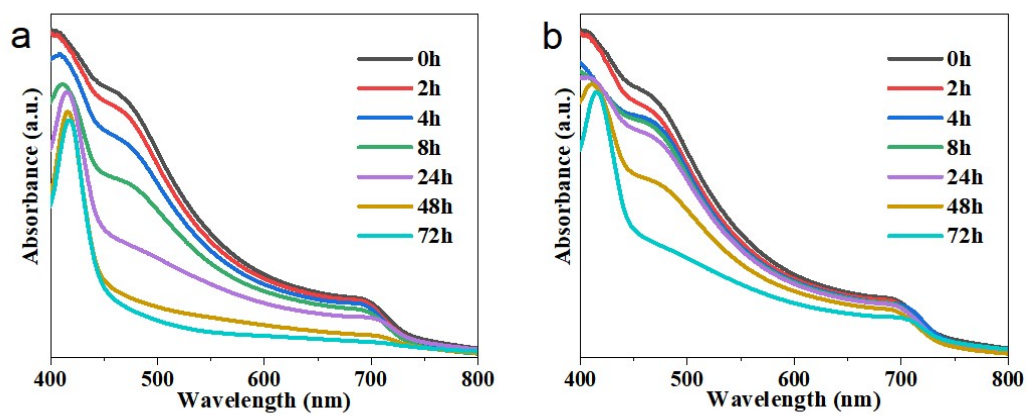

**Fig. S11.** The evolution of the UV-vis spectra of the films during aging for 72 hours. (a) the  $\text{CsPbI}_3$  and (b) the  $0.2\text{PAN-CsPbI}_3$  (at the ambient conditions with  $30\pm 5\%$  RH and at  $25^\circ\text{C}$ ).

Table S1. TRPL characteristic values of the CsPbI<sub>3</sub> and the 0.2PAN-CsPbI<sub>3</sub> perovskites.

| Samples                   | $\tau_1$ (ns) | $A_1$   | $\tau_2$ (ns) | $A_2$  | $\tau_{ave}$ (ns) |
|---------------------------|---------------|---------|---------------|--------|-------------------|
| CsPbI <sub>3</sub>        | 2.91          | 2173.32 | 6.43          | 168.36 | 3.42              |
| 0.2PAN-CsPbI <sub>3</sub> | 5.43          | 3005.63 | 12.72         | 332.08 | 6.93              |

Note:  $\tau_{ave} = (A_1 * \tau_1^2 + A_2 * \tau_2^2) / (A_1 * \tau_1 + A_2 * \tau_2)$
